# Supplementary material
Source: PubMed Central journal article supplement (PMC8092739)
Supplement: JCM.02252-20-s0001.pdf [file JCM.02252-20-s0001.pdf]

Supplemental table 1. Demographic and Clinical Characteristics of NMH Patients with *C. auris*

| <u>Characteristic</u>          | Patients, No. (%) |                  |              | p-value      |
|--------------------------------|-------------------|------------------|--------------|--------------|
|                                | Total (n=20)      | Nosocomial (n=5) | POA (n=15)   |              |
| Age, median (IQR)              | 55.5 (27-70)      | 64 (32-81)       | 53.0 (27-68) | 0.904        |
| Female sex                     | 8 (40)            | 4 (80)           | 4 (26.7)     | <b>0.035</b> |
| Average BMI                    | 30.8              | 29.8             | 31.1         | 0.839        |
| <u>Risk factors</u>            |                   |                  |              |              |
| SNF                            | 15 (75)           | 3 (60)           | 12 (80)      | 0.371        |
| CCI, median (IQR)              | 4.5 (3-9)         | 9 (9-13)         | 4 (3-6)      | <b>0.018</b> |
| Central venous catheter        | 14 (70)           | 5 (100)          | 9 (60)       | 0.091        |
| Prior bacteremia               | 11 (55)           | 3 (60)           | 8 (53.3)     | 0.795        |
| Pre-existing pulmonary disease | 16 (80)           | 4 (80)           | 12 (80)      | 1.000        |
| Diabetes mellitus              | 8 (40)            | 3 (60)           | 5 (33.3)     | 0.292        |
| Concurrent MDRO colonization   | 16 (80)           | 5 (100)          | 11 (73.3)    | 0.197        |
| Wounds                         | 19 (95)           | 5 (100)          | 14 (93.3)    | 0.554        |
| Surgery                        | 14 (70)           | 3 (60)           | 11 (73.3)    | 0.573        |
| Tracheostomy                   | 12 (60)           | 3 (60)           | 9 (60)       | 1.000        |
| Foley catheter                 | 13 (65)           | 4 (80)           | 9 (60)       | 0.417        |
| Feeding tube                   | 12 (60)           | 4 (80)           | 8 (53.3)     | 0.292        |
| Hemodialysis                   | 8 (40)            | 4 (80)           | 4 (26.7)     | <b>0.035</b> |
| TPN                            | 1 (5)             | 0                | 1 (6.7)      | 0.554        |
| Blood transfusion              | 9 (45)            | 4 (80)           | 5 (33.3)     | 0.069        |
| Diarrhea                       | 12 (60)           | 5 (100)          | 7 (46.7)     | <b>0.035</b> |
| Homelessness                   | 2 (10)            | 0 (0)            | 2 (13.3)     | 0.389        |
| C.diff colitis                 | 5 (25)            | 1 (20)           | 4 (26.7)     | 0.766        |
| Abx                            | 19 (95)           | 5 (100)          | 14 (93.3)    | 0.554        |
| Abx days, median (IQR)         | 24 (12-34)        | 32 (31-42)       | 20 (7-28)    | 0.371        |
| AF                             | 5 (25)            | 2 (40)           | 3 (20)       | 0.371        |
| <u>Outcomes</u>                |                   |                  |              |              |
| Colonization                   | 13 (65)           | 3 (60)           | 10 (66.7)    | 0.787        |
| 1-year Mortality               | 5 (25)            | 3 (60)           | 2 (13.3)     | <b>0.037</b> |

IQR, interquartile range; BMI, body mass index; SNF, skilled nursing facility; CCI, Charlson comorbidity index; Abx, prior antibiotic use; AF, prior antifungal use; MDRO, multidrug-resistant organism; TPN, total parenteral nutrition; 1-year mortality rate, death due to any cause up to 1 year after diagnosis with *C. auris* as determined through medical record review.

Comparison of clinical characteristics of nosocomial and POA patients

Supplemental Table 2: SNV differences between different isolates

| Group                     | SNV differences, median (IQR) | SNV differences, min | SNV differences, max |
|---------------------------|-------------------------------|----------------------|----------------------|
| Nosocomial                | 14 (11.25 – 16.5)             | 7                    | 20                   |
| POA                       | 20 (19 – 28.75)               | 2                    | 33                   |
| Nosocomial vs POA         | 21 (16 – 24)                  | 4                    | 27                   |
| Body site (CA15-CA18)     | 7                             | 7                    | 9                    |
| Environmental (CA08-CA11) | 6                             | 5                    | 8                    |
| NMH                       | 20 (16.75 – 24)               | 2                    | 33                   |
| ACL                       | 18 (11.25 – 22.75)            | 10                   | 27                   |
| NMH vs ACL                | 20 (14.25 – 24.75)            | 4                    | 33                   |

All pairwise SNV differences between isolates are included here. Non-clinical isolates (CA08-CA10 and CA16-CA18) were excluded from Nosocomial, POA, NMH, and ACL calculations.
